# Supplementary material
Source: publisher figshare collection journal article supplement (https://acs.figshare.com/ndownloader/files/10153932)
Supplement: Supplementary file 1 [file 10153932]

## Sheet: summary
列1	列2	列3	列4	列5	列6	列7	列8	列9	列10
		Estimated adsorbance at equilibrium sulfur concentration of 700 ppm						Saturated Adsorbance
Reference	MOFs	Data sources		BT	DBT	Data sources		BT	DBT
23	MOF-177	Supporing information of ref 23		3.91	6.86
	MOF-5	Supporing information of ref 23		6.05	17
	HKUST-1	Supporing information of ref 23		13.1	38.4
	UMCM-150	Supporing information of ref 23		25.1	60.1
	MOF-505	Supporing information of ref 23		40	41.2	Reading Figure 1(middle)			40
33	MOF-5	Taken from Table 2 of ref 33		21.1
	MOF-5/2Cu(I)			58.9
	MOF-5/4Cu(I)			84.5
	MOF-5/3Cu(I)			94.2
34	Cu3(NAPANA)	Reading Figure 4 of ref 34		18.2343	27.5819
35	MIL-53(Al)	Reading Figure 2(a) of ref 35		3.57675		Taken from Table 1		8.20268
	MIL-53(Cr)	Reading Figure 2(a) of ref 35		9.538		Taken from Table 1		19.076
	MIL-47	Reading Figure 2(a) of ref 35		26.2295		Taken from Table 1		51.3621
36	MIL-47	Reading Figure 2(a) of ref 36		28.8048		Taken from Table 1		55.082
	CuCl2(0.15)-MIL-47	Reading Figure 2(a) of ref 36		45.377		Taken from Table 1		63.4277
	CuCl2(0.05)-MIL-47	Reading Figure 2(a) of ref 36		63.2608		Taken from Table 1		73.9195
	CuCl2(0.02)-MIL-47	Reading Figure 2(a) of ref 36		60.614		Taken from Table 1		69.389
37	MIL-53(Al)						Taken from Table S2 in Supporting Information		69.6407
32	C300(HKUST-1)	Reading Figure 7 in ref 32		26	38.2
	A100(MIL-53(Al))	Reading Figure 5 in ref 32			31.4	Reading Figure 5 of ref 32			38.6
38	MIL-53(Fe)Hydrated					Taken from Table 1 of ref 38		50.0782
	MIL-53(Fe) Dehydrated					Taken from Table 1 of ref 38		36.3545
39	MIL-101(Cr)	Taken from Figure 3 of ref 39			10
40	UMCM-152	Reading Figure 7(a) in ref 40			37.1
	UMCM-153	Reading Figure 7(a) in ref 40			76.8
41	NENU-511	Data from Support information in ref 41		41.9	48.5
	NENU-512	Data from Support information in ref 41		23.5	32.2
	NENU-513	Data from Support information in ref 41		17	32.7
	NENU-514	Data from Support information in ref 41		14.1	33
this work	SIFSIX-1-Cu			42.1728	49.4607
	Cu-BTC precipitate				6.19
Note The interpolation process is referred to ref 23 and ref 41 of this excel

## Sheet: ref 23
MOF-177
BT		DBT
0	0	0	0
103.62	0.41	89.28	0.86
107.04	0.42	90.42	0.91
108.64	0.77	101.44	0.86
332.19	1.38	288.36	2.89
341.44	1.5	289.53	3.15
354.86	1.69	333.72	2.36
675.86	3.82	614.7	6.22
700.76	3.94	620.69	6.6
729.12	4.7	680.59	6.43
1259.09	6.79	1172.94	11.45
1305.45	5.73	1176.13	12.48
1326.62	8.65	1266.18	11.33
1851	8.79	1739.66	18.34
1880.07	8.78	1755.58	18.73
1917.17	8.23	1851.52	15.58
700	3.90729	700	6.86225
MOF-5
BT		DBT
0	0	0	0
76.1	0.55	28.54	0.97
79.13	0.72	41.05	1.32
94.72	0.76	60.66	1.94
249.77	1.81	102.02	3.25
260.16	2.36	142.22	4.4
305.15	2.56	209.12	6.2
533.49	4.07	242.88	7.44
552.49	5.34	335.27	9.74
642.4	5.65	474.98	13.1
1051.06	7.82	603.97	15.09
1093.03	9.72	782.19	18.45
1187.12	11.9	1003.53	23.01
1621.4	12.21	1158.32	23.89
1656.69	15.56	1360.76	28.25
1780.94	16.39	1589.36	34.37
700	6.0456	700	17.0446
HKUST-1
BT		DBT
0	0	0	0
37.81	1.02	10.01	1.46
42.38	1.21	13.47	2.02
52.06	1.57	18.01	3.59
133.97	3.38	42.07	4.97
151.32	3.95	49.19	6.95
192.9	4.76	81.13	11.61
319.63	7.48	100.77	11.81
356.92	8.65	138.74	15.93
463.22	9.49	252.97	24.15
775.53	13.83	323.72	25.68
842	15.5	491.52	30.85
972.59	17.36	784.86	38.15
1363.25	20.85	892.09	39.86
1461.21	21.87	1131.23	44.06
1489.98	30.63	1515.05	43.17
700	13.1135	700	38.3585
UMCM-150
BT		DBT
0	0	0	0
22.72	1.81	6.26	1.41
27.07	2.25	8.47	1.99
43.41	3.18	11.44	2.85
99.94	5.74	19.49	4.2
121.35	6.91	28.54	5.81
165.84	9.8	31.69	2.18
275.47	12.2	33.43	3.31
317.29	14.58	39.13	7.56
415.68	19.65	39.74	6.2
709.82	22.75	55.54	10.41
811.81	25.16	58.65	10.86
954.01	32.45	59.1	9.24
1240.08	37.45	84.85	14.81
1406.26	37.42	117.58	15.71
1591.26	42.48	132.02	18.25
		170.18	22.26
		194.76	25.19
		241.16	26.64
		285.69	32.1
		442.99	49.68
		523.23	38.77
		608.47	60.84
		932.53	71.09
		978.33	67.84
		1238.44	78.62
		1609.47	83.35
700	25.096	700	60.1097
MOF-505
BT		DBT
0	0	0	0
6.78	1.35	1.1	2.42
6.83	3.2	1.12	3.74
7.53	1.71	1.25	5.83
25.88	5.95	1.61	5.45
28.27	4.65	1.63	8.5
43.29	10.49	2.23	5.43
93.36	10.73	2.71	2.64
94.54	13.62	4.84	19.11
164.39	22.63	7.4	14.06
324.56	23.06	7.42	12.08
360.64	28.3	28.21	19.96
614.13	39.34	160.29	37.13
719.51	41.69	258.15	28.47
942.58	43.34	535.75	31.18
1284.94	52.95	885.4	41.85
		915.02	38.57
		1181.06	44.01
		1582.46	47.3
700	39.9765	700	41.1541

## Sheet: ref 41
NENU-511 forBT
0	0
389	31.96
767	45.3
1024	54.5
1509	65.38
1906	79
2145	89.9
2644	95.51
3148	101.89
700	41.8835
NENU-511 for DBT
0	0
497	40.19
747	46.91
942	60.9
1407	78.82
1646	86.95
1974	96.59
700	48.4605
NENU-512 for BT
0	0
469	17.62
784	22.61
1311	41.34
1581	43.91
1941	58.56
2513	60.56
2949	64.93
3301	73.28
700	23.5279
NENU-512 for DBT
0	0
519	29.34
777	33.78
1003	41.55
1307	72.58
1631	70.04
1862	87.84
2239	79.78
700	32.2375
NENU-513 for BT
0	0
463	9.56
791	19.83
1224	27.71
1656	41.81
2024	44.2
2372	52.32
2862	53.51
3268	60.2
700	16.9708
NENU-513 for DBT
0	0
510	21.92
750	33.76
940	48.37
1380	58.46
1659	65.25
1960	77.95
2229	74.99
700	32.7102
NENU-514 for BT
0	0
443	10.33
802	16.69
1323	25.23
1721	35.73
2109	41.14
2354	46.87
2814	51.87
3260	53.58
700	14.1199
NENU-514 for DBT
0	0
526	23.06
794	40.67
1035	45.15
1395	63.37
1739	58.72
2048	68.36
2241	79.52
700	33.0023
